# Supplementary material for: De novo Assembly of the Indo-Pacific Humpback Dolphin Leucocyte Transcriptome to Identify Putative Genes Involved in the Aquatic Adaptation and Immune Response
Source: PLoS One. 2013 Aug 28;8(8):e72417. doi: 10.1371/journal.pone.0072417 (PMC3756080; doi:10.1371/journal.pone.0072417)
Supplement: Table S4 — Putative sequences related to the immune response. (XLS) [file pone.0072417.s004.xls]

## Sheet: Sheet1
Table S4: Putative sequences related to the immune response.
Functional classidication	Predicted gene	Number of contigs and unigenes
Antigen processing and presentation	proteasome activator complex subunit 1 isoform 2	2
	AP-1 complex subunit beta-1 isoform 5	5
	AP-1 complex subunit beta-1 isoform 2	2
	Adaptor-related protein complex 2, beta 1 subunit	1
	Unc-93 homolog B1	8
	P40-phox	8
	Proteasome subunit beta type-4 precursor	4
	AP-3 complex subunit delta-1（adaptor-related protein complex 3, delta-1 subunit）	9
	Proteasome subunit beta type-10 precursor	1
Cell recognition	Laminin alpha 5	13
	Versican	8
	CD5 molecule precurso	6
	Natural cytotoxicity triggering receptor 3	2
	Platelet endothelial cell adhesion molecule	4
Toll-like receptors	Toll-like receptor 1	3
	Toll-like receptor 2	7
	Toll-like receptor 3	5
	Toll-like receptor 4	4
	Toll-like receptor 5	5
	Toll-like receptor 6	4
	Toll-like receptor 7	5
	Toll-like receptor 8	4
	Toll-like receptor 9	4
	Toll-like receptor 10	1
	MyD88	1
	Mitogen-activated protein kinases	48
	Interleukin-1 receptor-associated kinase 4	2
Cytokines	Interleukin -1α/β	14
	Interleukin -17	2
	Interleukin -18	3
	Interleukin -24	1
	C-C motif chemokine 4	2
	C-C motif chemokine 5	1
	C-X-C motif chemokine 1	4
	C-X-C motif chemokine 2	4
	C-X-C motif chemokine 3	4
	Interferon α	3
	Interferon β	1
	Cytokine receptors	32
Cell receptor signaling	Leupaxin	4
	Caspase recruitment domain-containing protein 11	6
	Ubiquitin-associated and SH3 domain-containing protein A	4
	Tyrosine-protein kinase Lck	7
	Roquin	3
Complement system	Complement receptor type 1	7
	Complement receptor type 2	2
	Complement receptor type 3	6
	Complement receptor type 4	3
	Complement receptor type 6	0
IFN signalling	Interferon regulatory factor 2	12
	Interferon regulatory factor 3	7
	Interferon regulatory factor 7	27
	Suppressor of cytokine signaling 3	2
	Suppressor of cytokine signaling 5	3
	Suppressor of cytokine signaling 6	1
B cell response	CD9 antigen	2
	Kelch-like protein 6	2
	Differentiation antigen CD19	1
	Tyrosine-protein kinase Blk	3
JAK-STAT pathways	Signal transducers and activators of transcription 1	18
	Signal transducers and activators of transcription 2	32
	Signal transducers and activators of transcription 3	3
	Signal transducers and activators of transcription 4	4
	Signal transducers and activators of transcription 5	28
	Signal transducers and activators of transcription 6	5
	Janus kinase 1	5
	Janus kinase 2	10
	Janus kinase 3	23
	Tyrosine kinase 2	18
